# Supplementary material
Source: MDPI journal article supplement (https://www.mdpi.com/2071-1050/9/11/2016)
Supplement: s1 [file s1]

### Additional Document

1. MDPI: Please carefully check the accuracy of names and affiliations. Changes will not be possible after proofreading.

Reply: Yes, we've checked the accuracy of names and affiliations.

2. Linnea Anderesson: Please define.

Reply: We've defined "Hukou" in the first paragraph of **Introduction** (in Page 1).

3. Linnea Anderesson: Please define abbreviations.

Reply: We've defined every abbreviation in Page 8 and Page 9. We defined PHCI as "personal health consciousness", SMCON as "consciousness towards the concern of smog", SMINF as "consciousness towards the influence of smog", HECI as "health-environmental consciousness", INSUR as "insurance", SIZE as "family size", EDUCA as "educational level", BLPR as "blood pressure". In addition, all the abbreviations are well explained in the original manuscript, which could be notice in the last paragraph of Page 8.

4. MDPI: The footnote has been moved here, please confirm.

Reply: Yes, we've confirmed this.

5. MDPI: Please add the author contributions for this paper.

Reply: we've added the author contributions for this paper (in Page 13).

6. Please disclose conflicts of interest, or add 'The authors declare no conflicts of interest'.

Reply: We've added "The authors declare no conflicts of interest" (in Page 13).

7. Please add page number and volume or instead with a doi number.

Reply: We've added page number and volume (in Page 13).

8. We've added our additional funds in **Acknowledgements** (in Page 13).
